# Supplementary material
Source: ML conference proceedings conference paper supplement (https://proceedings.mlr.press/v97/liu19e.html)
Supplement: Supplementary file 1 [file liu19e-supp.pdf]

## A. Details on the offline attacks

### A.1. Proof of Theorem 1

*Proof.* The optimization problem  $P_1$  is a quadratic program with linear constraints in  $\{\vec{\epsilon}_a\}_{a \in \mathcal{A}}$ . Now it remains to show that the constraint set is non-empty.

Given any reward instance  $\{\vec{y}_a\}_{a \in \mathcal{A}}$ , any margin parameter  $\xi > 0$  and any  $\vec{\epsilon}_{a^*}$ , one can check that

$$\vec{\epsilon}_a = [(\vec{y}_{a^*} + \vec{\epsilon}_{a^*})^T \mathbf{1}/m_{a^*} - \vec{y}_a^T \mathbf{1}/m_a - \xi] \mathbf{1}, \quad \forall a \neq a^*, \quad (27)$$

satisfies the constraints of problem  $P_1$ . That is the constraint set of problem  $P_1$  is non-empty.

Thus, there exists at least one optimal solution of problem  $P_1$  since  $P_1$  is a quadratic program with non-empty and compact constraints. The result follows from Proposition 1.  $\square$

### A.2. Details on attacking Thompson Sampling

**Lemma 2.** *Given some constants  $C_i > 0$  for any  $i < K$ . The function  $f(\vec{x}) = \sum_{i=1}^{K-1} \Phi(C_i x_i - C_i x_K)$  is convex on the domain  $D = \{\vec{x} \in \mathcal{R}^K | x_i - x_K \leq 0, \forall i < K\}$ .*

*Proof.* We prove the result by checking the Hessian matrix  $H$  of function  $f(\vec{x})$ . Note that  $\Phi(x)$  is the cumulative distribution function of the standard normal distribution  $\mathcal{N}(0, 1)$ . For any  $i < K$ , we have that

$$\frac{\partial f}{\partial x_i} = \frac{C_i}{\sqrt{2\pi}} e^{-(C_i x_i - C_i x_K)^2/2}, \quad (28)$$

$$\frac{\partial^2 f}{\partial x_i^2} = -\frac{C_i^2}{\sqrt{2\pi}} e^{-(C_i x_i - C_i x_K)^2/2} (C_i x_i - C_i x_K). \quad (29)$$

On the other hand, we have that

$$\frac{\partial f}{\partial x_K} = \sum_{i=1}^{K-1} -\frac{C_i}{\sqrt{2\pi}} e^{-(C_i x_i - C_i x_K)^2/2} = \sum_{i=1}^{K-1} -\frac{\partial f}{\partial x_i}, \quad (30)$$

$$\frac{\partial^2 f}{\partial x_K^2} = \sum_{i=1}^{K-1} -\frac{C_i^2}{\sqrt{2\pi}} e^{-(C_i x_i - C_i x_K)^2/2} (C_i x_i - C_i x_K) = \sum_{i=1}^{K-1} \frac{\partial^2 f}{\partial x_i^2}. \quad (31)$$

Now, we derive the other coefficients. For any pair  $(i, j)$  such that  $i \neq j$ ,  $i < K$  and  $j < K$ , we have that

$$\frac{\partial^2 f}{\partial x_i \partial x_j} = 0. \quad (32)$$

For any  $i < K$ , we have that

$$\frac{\partial^2 f}{\partial x_i \partial x_K} = \frac{C_i^2}{\sqrt{2\pi}} e^{-(C_i x_i - C_i x_K)^2/2} (C_i x_i - C_i x_K) = -\frac{\partial^2 f}{\partial x_i^2}, \quad (33)$$

$$\frac{\partial^2 f}{\partial x_K \partial x_i} = -\frac{\partial^2 f}{\partial x_i^2} \quad (34)$$

Since the constants  $C_i$  are positive, we have that  $\frac{\partial^2 f}{\partial x_i^2} \geq 0$  in the domain  $D$ . The Hessian matrix of  $f$  is the following,

$$H = \begin{bmatrix} \frac{\partial^2 f}{\partial x_1^2} & 0 & \cdots & 0 & -\frac{\partial^2 f}{\partial x_1^2} \\ 0 & \frac{\partial^2 f}{\partial x_2^2} & \cdots & 0 & -\frac{\partial^2 f}{\partial x_2^2} \\ \vdots & \vdots & \ddots & \vdots & \vdots \\ 0 & 0 & \cdots & \frac{\partial^2 f}{\partial x_{K-1}^2} & -\frac{\partial^2 f}{\partial x_{K-1}^2} \\ -\frac{\partial^2 f}{\partial x_1^2} & -\frac{\partial^2 f}{\partial x_2^2} & \cdots & -\frac{\partial^2 f}{\partial x_{K-1}^2} & \sum_{i=1}^{K-1} \frac{\partial^2 f}{\partial x_i^2} \end{bmatrix}. \quad (35)$$

Hence, for any vector  $\vec{y} \in \mathcal{R}^K$ , we have that

$$\vec{y}^T H \vec{y} = \vec{y}^T \begin{bmatrix} \frac{\partial^2 f}{\partial x_1^2}(y_1 - y_K) \\ \frac{\partial^2 f}{\partial x_2^2}(y_2 - y_K) \\ \vdots \\ \frac{\partial^2 f}{\partial x_{K-1}^2}(y_{K-1} - y_K) \\ \sum_{i=1}^{K-1} -\frac{\partial^2 f}{\partial x_i^2}(y_i - y_K) \end{bmatrix} = \sum_{i=1}^{K-1} \frac{\partial^2 f}{\partial x_i^2}(y_i - y_K)^2 \geq 0. \quad (36)$$

Since  $H$  is positive semi-definite, we show that  $f(\vec{x})$  is convex on the domain  $D$ .  $\square$

### A.3. Proof of Proposition 2

*Proof.* By Lemma 2 and the fact that affine mapping keeps the convexity, we have the result.  $\square$

### A.4. Another relaxation of P for Thompson Sampling

We may find a sufficient constraint to equation (17) as

$$\Phi \left( \frac{\tilde{\mu}_a(T) - \tilde{\mu}_{a^*}(T)}{\sigma^3 \sqrt{1/m_a + 1/m_{a^*}}} \right) \leq \frac{\delta}{K-1}, \quad \forall a \neq a^*. \quad (37)$$

Then, we derive another relaxation of P as

$$P_4 : \min_{\vec{\epsilon}_a : a \in \mathcal{A}} \sum_{a \in \mathcal{A}} \|\vec{\epsilon}_a\|_2^2 \quad (38)$$

$$s.t. \quad \tilde{\mu}_a(T) - \tilde{\mu}_{a^*}(T) \leq \sigma^3 \sqrt{1/m_a + 1/m_{a^*}} \Phi^{-1} \left( \frac{\delta}{K-1} \right), \quad \forall a \neq a^* \quad (39)$$

Note that problem  $P_4$  is a quadratic program with linear constraints.

## B. Details on the online attacks

### B.1. Proof of Proposition 4

*Proof.* By equation (5), a logarithmic regret bound implies that the bandit algorithm satisfies  $\mathbb{E}[N_a(T)] = O(\log T)$  for any suboptimal arm  $a$ . Note that the oracle constant attack shifts the expected rewards of all arms except for the target arm  $a^*$ . Since  $C_a > [\mu_a - \mu_{a^*}]^+$ ,  $\forall a \neq a^*$ , the best arm is now the target arm  $a^*$ . Then, the bandit algorithm satisfies  $\mathbb{E}[N_a(T)] = O(\log T)$ ,  $\forall a \neq a^*$ . Thus, the expected number of pulling the target arm is

$$\mathbb{E}[N_{a^*}(T)] = T - \sum_{a \neq a^*} \mathbb{E}[N_a(T)] = T - o(T). \quad (40)$$

Since the attacker does not attack the target arm, we have that

$$\mathbb{E}[C(T)] = \mathbb{E} \left[ \sum_{t=1}^T |\epsilon_t| \right] = \sum_{a \neq a^*} C_a \mathbb{E}[N_a(T)] = O \left( \sum_{a \neq a^*} C_a \log T \right). \quad (41)$$

On the other hand, suppose there exists an arm  $i \neq a^*$  such that  $C_i \leq [\mu_i - \mu_{a^*}]^+$ , then the attack is not successful. In the case that  $C_i < [\mu_i - \mu_{a^*}]^+$ , the arm  $i$  is the best arm rather than the target arm  $a^*$  in the shifted bandit problem. That is the expected number of pulling arm  $a^*$  is  $\mathbb{E}[N_{a^*}(T)] = O(\log T)$ . In the case that  $C_i = [\mu_i - \mu_{a^*}]^+$ , the arm  $i$  and  $a^*$  are both the best arms. That is the expected attack cost is  $\mathbb{E}[C(T)] = T - o(T)$ . In neither case is the attack successful. This concludes the proof.  $\square$

## B.2. Proof of Theorem 4

*Proof.* Given any  $\delta > 0$ , we have that  $\mathbb{P}(E) > 1 - \delta$  by Lemma 1. Under the event  $E$ , we have that at any time  $t$  and for any arm  $a \neq a^*$ ,

$$\mu_a - \mu_{a^*} < \hat{\mu}_a(t) - \mu_{a^*} + \beta(N_a(t)) \quad (42)$$

$$< \hat{\mu}_a(t) - \hat{\mu}_{a^*}(t) + \beta(N_a(t)) + \beta(N_{a^*}(t)), \quad (43)$$

which implies that

$$[\mu_a - \mu_{a^*}]^+ < [\hat{\mu}_a(t) - \hat{\mu}_{a^*}(t) + \beta(N_a(t)) + \beta(N_{a^*}(t))]^+. \quad (44)$$

By the same argument in the proof of Proposition 4, we have that under event  $E$ , the attacker is taking an effective attack for any bandit algorithm.

Recall that the bandit algorithm has a high-probability bound such that the regret is bounded by  $O(\log T)$  with probability at least  $1 - \delta$ . Under event  $E$ , we have that  $N_a(T) = O(\log T)$  for any  $a \neq a^*$  with high probability. Thus, with probability at least  $1 - 2\delta$ , we have that  $N_{a^*}(T) = T - o(T)$ . It remains to bound the cost of the attacker, i.e.,  $\sum_t |\epsilon_t|$ .

Given any arm  $a \neq a^*$ , any time  $t$  and under the event  $E$ , we have that

$$\hat{\mu}_a(t) - \hat{\mu}_{a^*}(t) < \mu_a - \hat{\mu}_{a^*}(t) + \beta(N_a(t)) \quad (45)$$

$$< \mu_a - \mu_{a^*} + \beta(N_a(t)) + \beta(N_{a^*}(t)). \quad (46)$$

This implies that

$$[\hat{\mu}_a(t) - \hat{\mu}_{a^*}(t) + \beta(N_a(t)) + \beta(N_{a^*}(t))]^+ \quad (47)$$

$$< [\mu_a - \mu_{a^*} + 2\beta(N_a(t)) + 2\beta(N_{a^*}(t))]^+ \quad (48)$$

$$\leq [\mu_a - \mu_{a^*}]^+ + 2\beta(N_a(t)) + 2\beta(N_{a^*}(t)). \quad (49)$$

Thus, the first statement follows. By the fact that  $\beta(n)$  is a decreasing function, we have that

$$\sum_{t=1}^T |\epsilon_t| \leq \sum_{t=1}^T ([\mu_{a_t} - \mu_{a^*}]^+ + 4\beta(1)) \mathbf{1}\{a_t \neq a^*\} \quad (50)$$

$$= \sum_{a \neq a^*} ([\mu_a - \mu_{a^*}]^+ + 4\beta(1)) N_a(T) \quad (51)$$

$$\leq O\left(\sum_{a \neq a^*} ([\mu_a - \mu_{a^*}]^+ + 4\beta(1)) \log T\right). \quad (52)$$

□
